# Supplementary material for: Wet sieving and magnetic separation for the treatment of radioactive secondary waste produced from waterjet abrasive suspension cutting
Source: Copernicus journal article supplement (doi:10.5194/sand-2-9-2023), 2023-09-06
Supplement: Supplementary file 1 [file sand-2-9-2023-supplement.pdf]

Supplement of Saf. Nucl. Waste Disposal, 2, 9–10, 2023  
<https://doi.org/10.5194/sand-2-9-2023-supplement>  
© Author(s) 2023. CC BY 4.0 License.

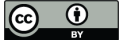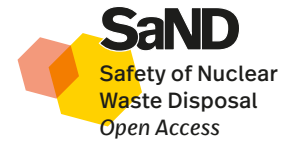

*Supplement of*

## **Wet sieving and magnetic separation for the treatment of radioactive secondary waste produced from waterjet abrasive suspension cutting**

**Muhammad Junaid Chaudhry et al.**

*Correspondence to:* Muhammad Junaid Chaudhry (muhammad.chaudhry@kit.edu)

The copyright of individual parts of the supplement might differ from the article licence.

# Wet sieving and magnetic separation for the treatment of radioactive secondary waste produced from waterjet abrasive suspension cutting

Muhammad Junaid Chaudhry

Institute of Technology and Management in Construction (TMB)

Institute for Nuclear Waste Disposal (INE)

SafeND | Berlin | 13.09.2023

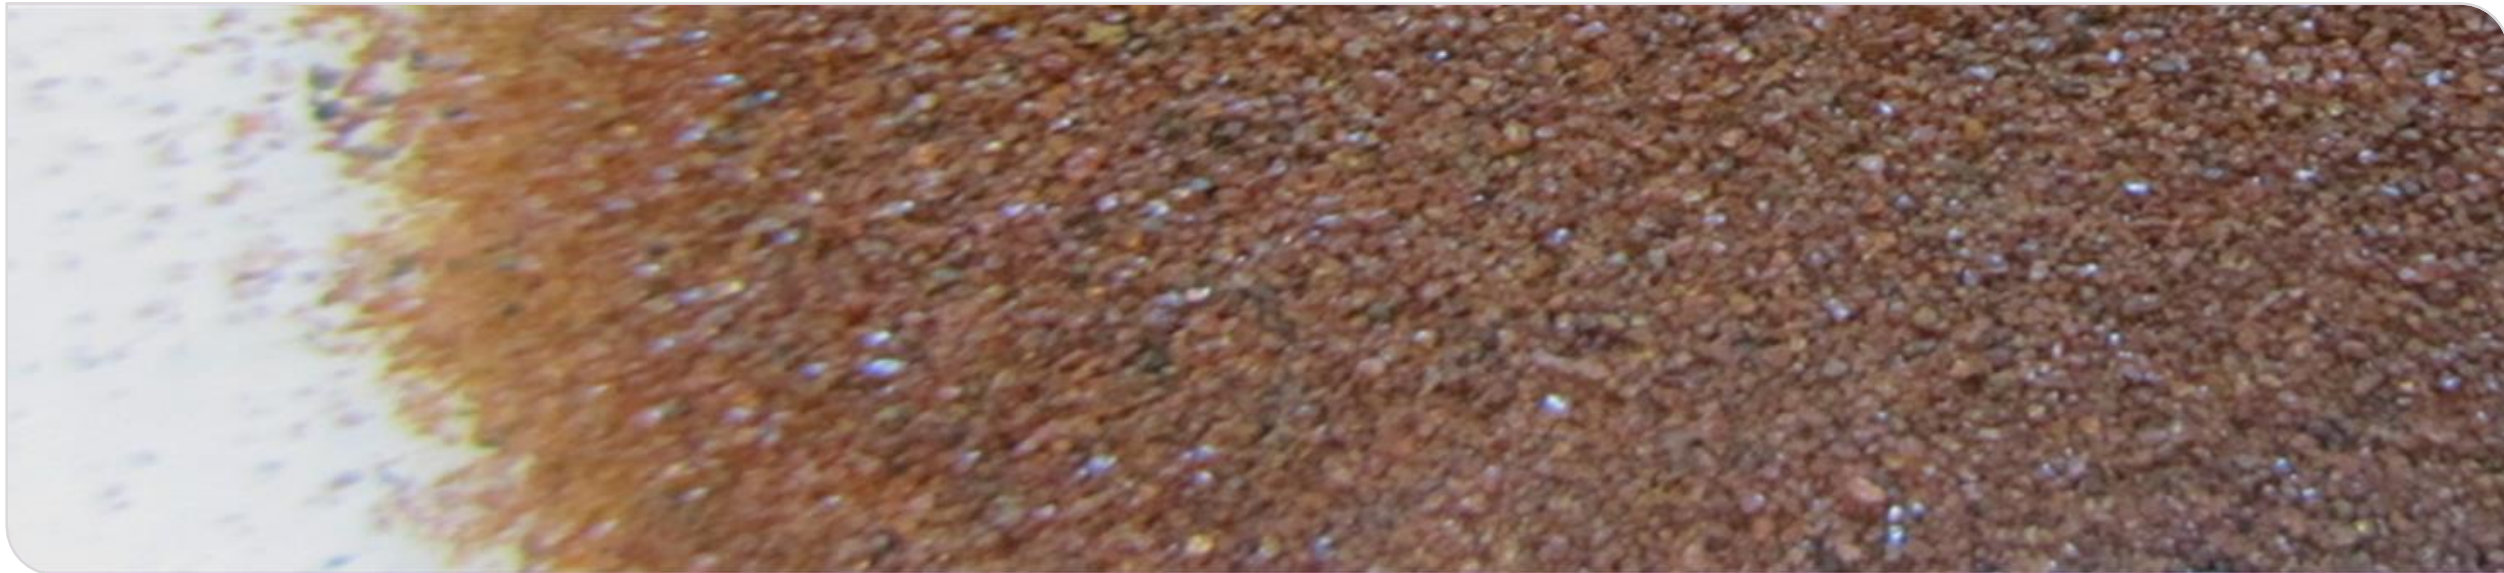

# Waterjet Abrasive Suspension Cutting (WAS)

Dismantling of the  
RPV and its internals

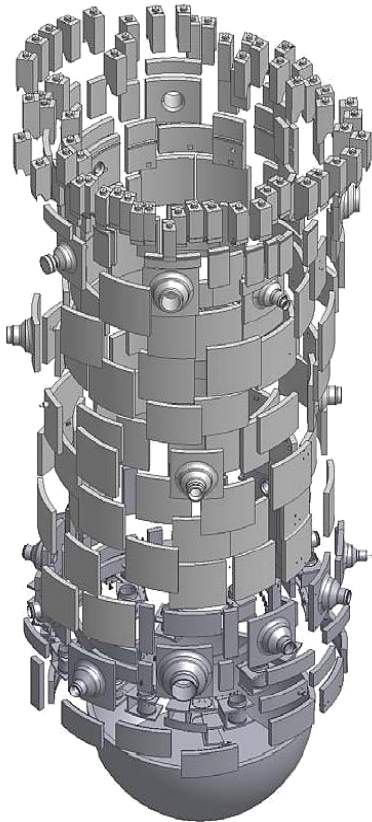

Reference: AREVA GmbH

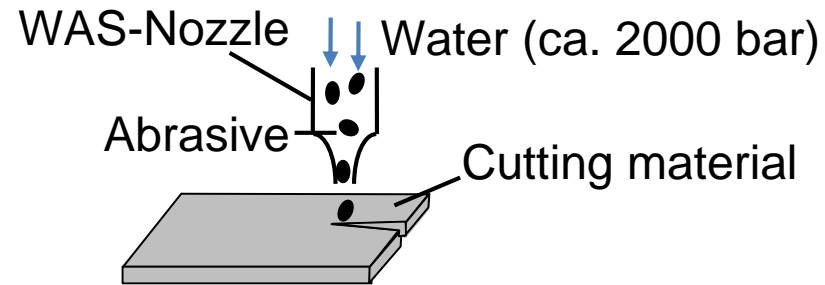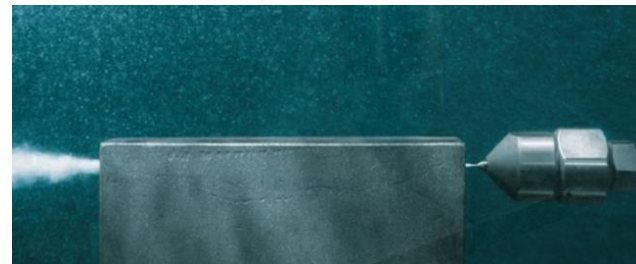

Reference: ANT AG

## Technical advantages:

- Remotely controlled to provide maximum safety for the operating personnel
- No aerosol byproducts
- Cutting capability for a wide variety of materials
- Application also underwater

## Downside:

- Large amount of secondary waste

# WAS-Cutting and secondary waste

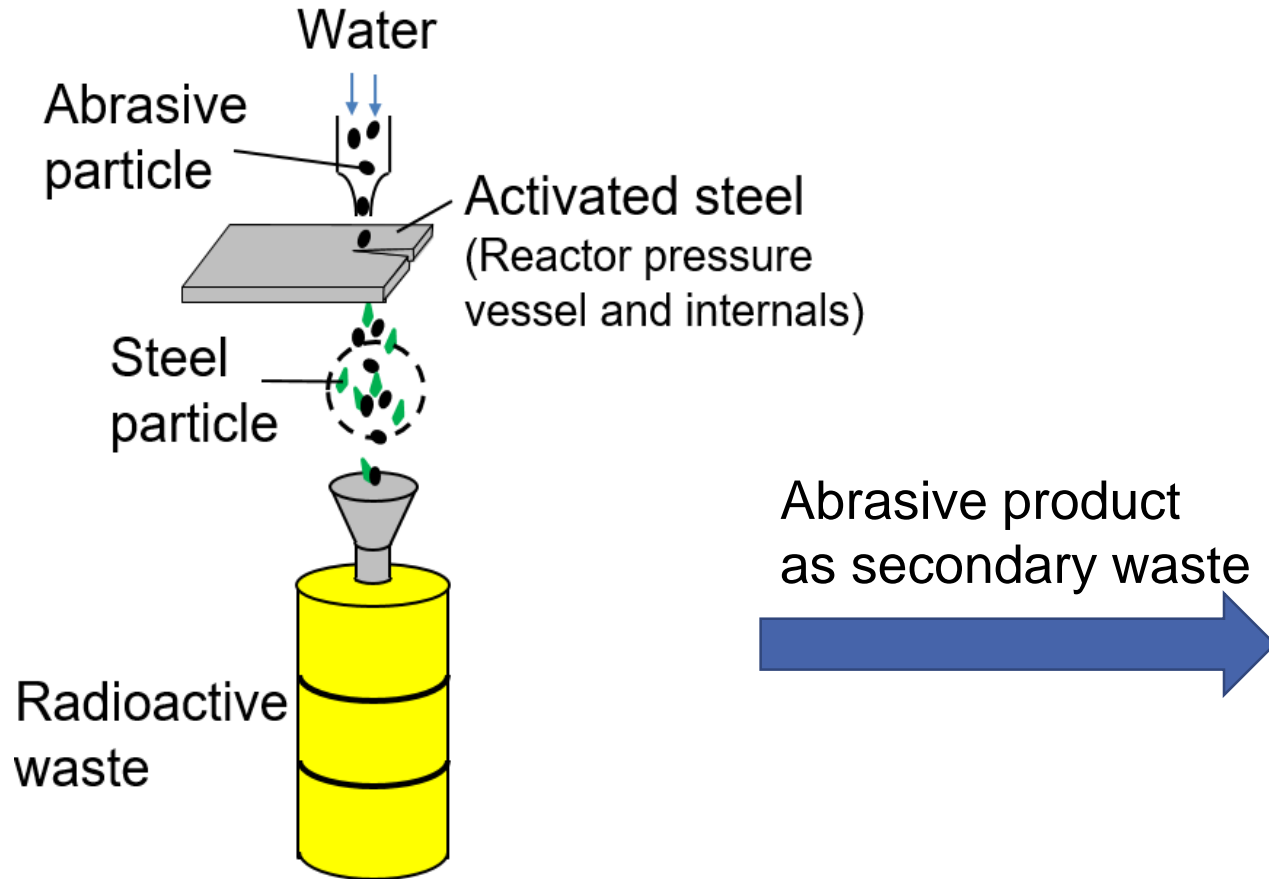

## Particle composition [M-%]:

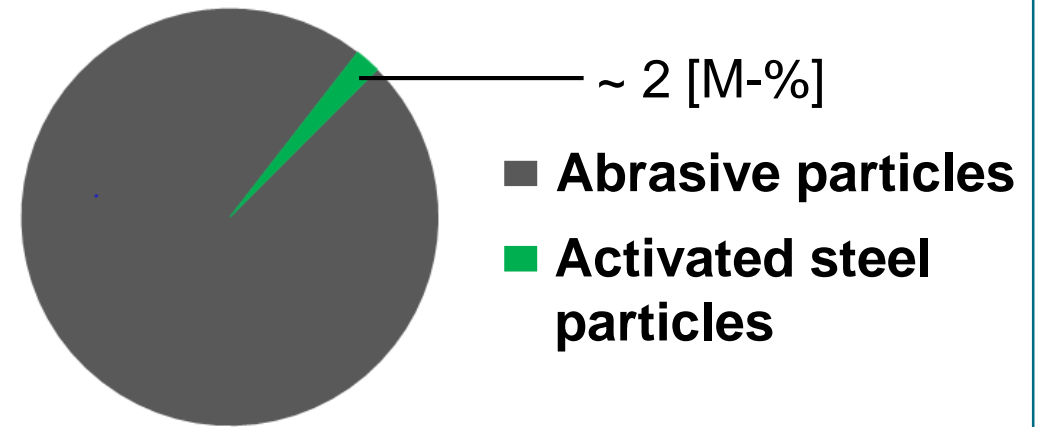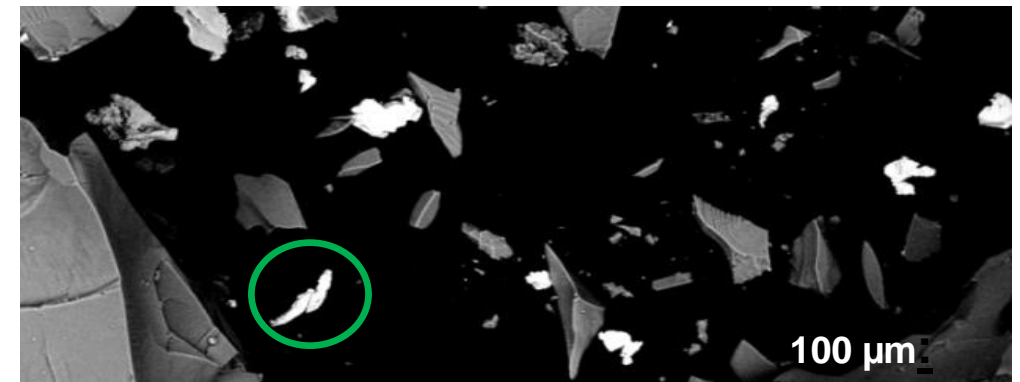

Reference: Dr. Schild, KIT-INE

# Principle of reuse of abrasive and separation process

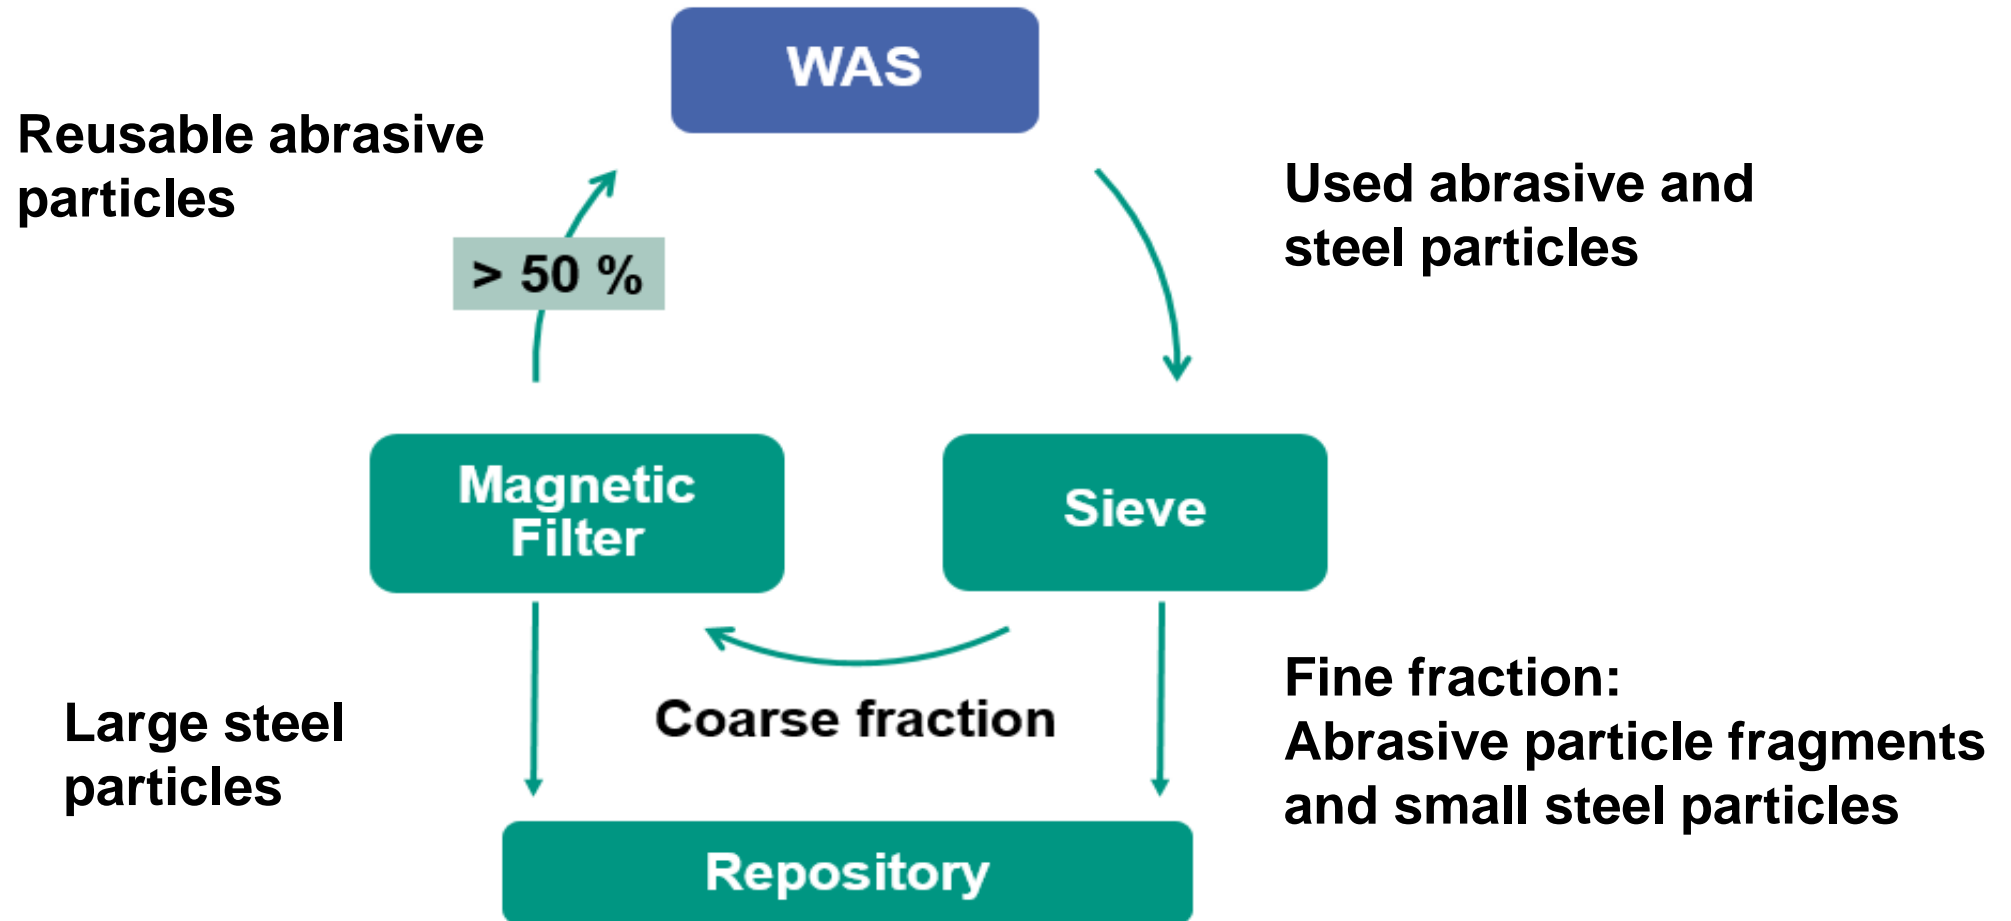

# Separation plant in batch operation

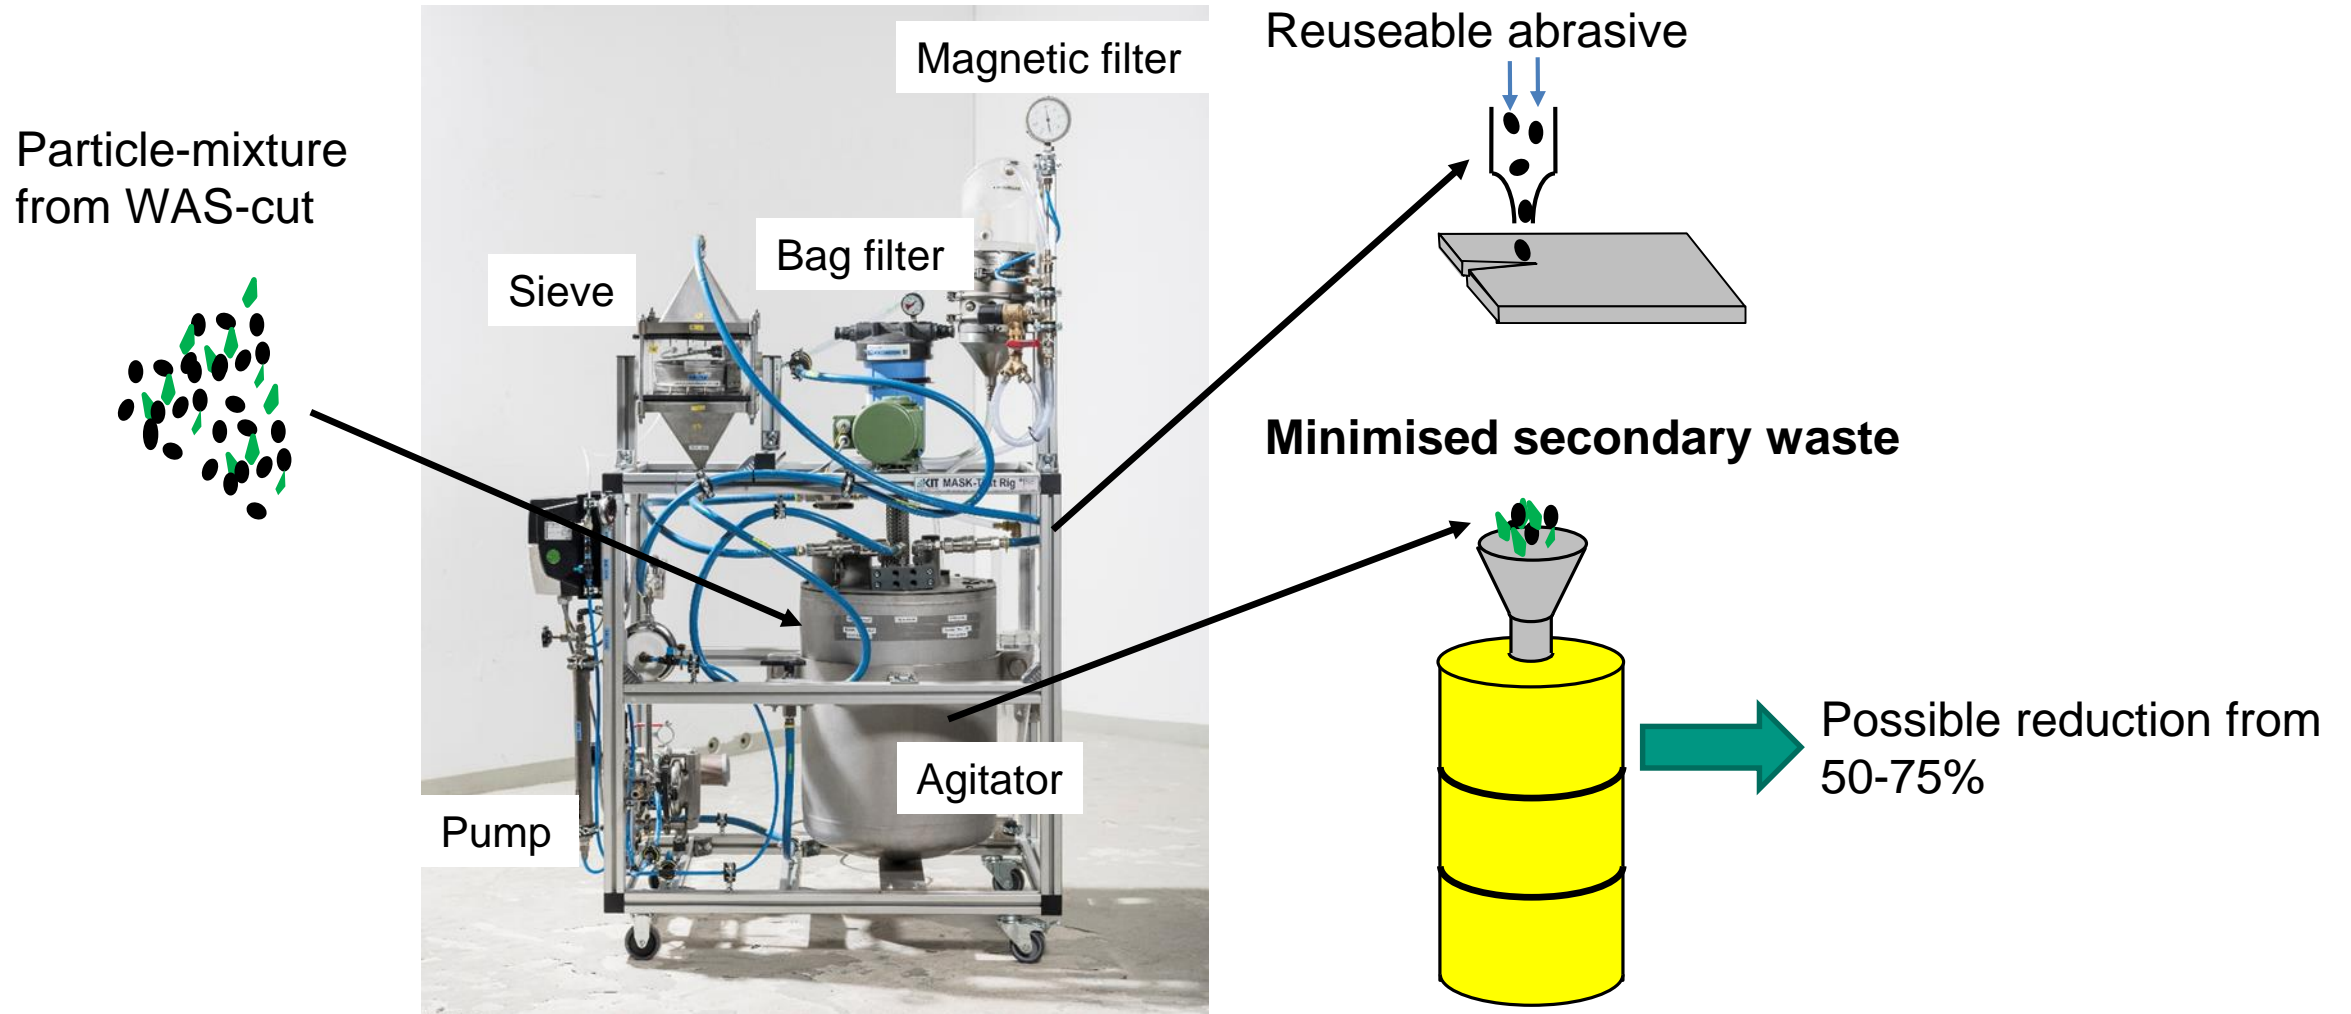

# Complications in batch operation

- Clogging and deterioration of the switch valves due to the abrasive
- Difficulty in operating the valves
- Interruption of the separation cycles for cleaning of the components
- Low separation rate
- **Rapid overloading of the magnetic filter**

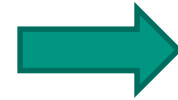

**Solution:** Transfer to continuous operation

Continuous operation:

- New operating principle of the plant
- Continuously operated sieve
- Continuously operated magnetic filter

# Complications in batch operation

- Rapid overloading of the magnetic filter

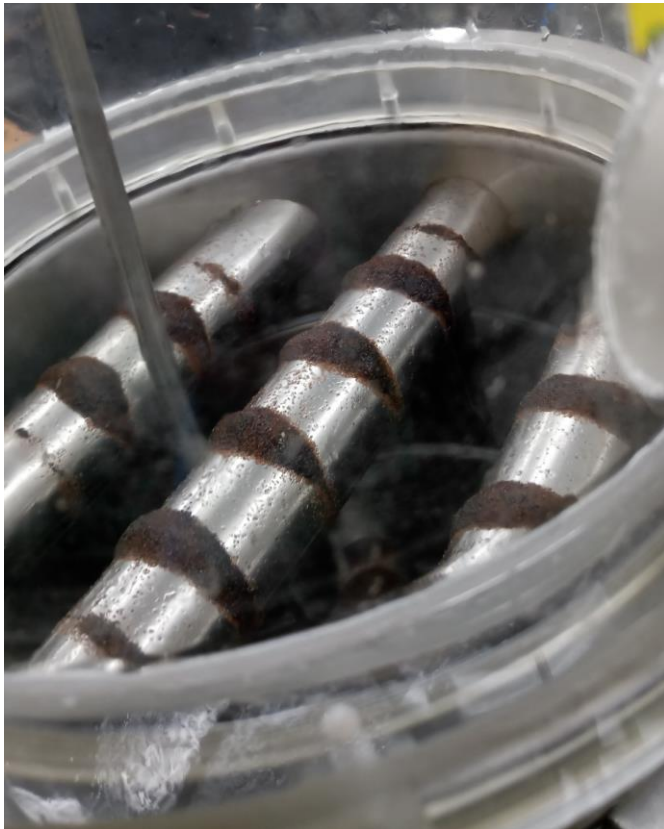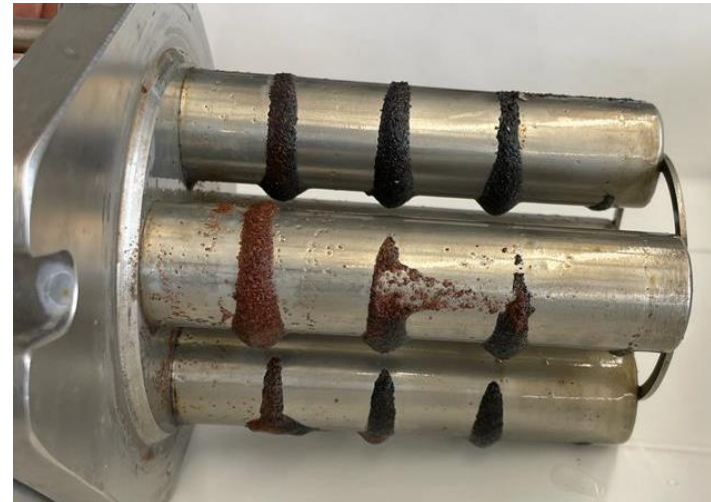

- Impurities and residual material in the plant

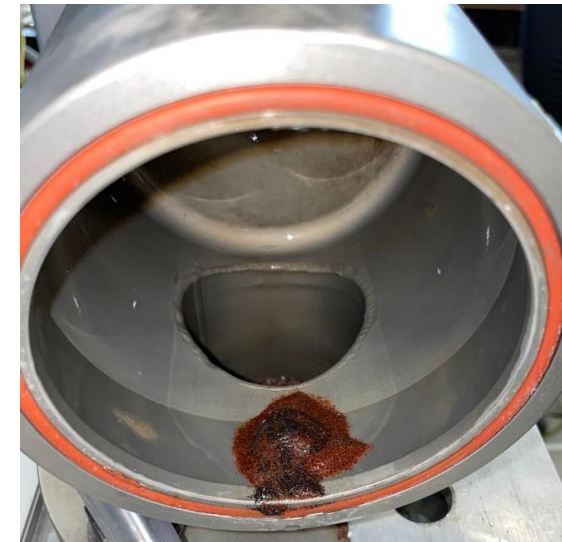



# Continuous operation

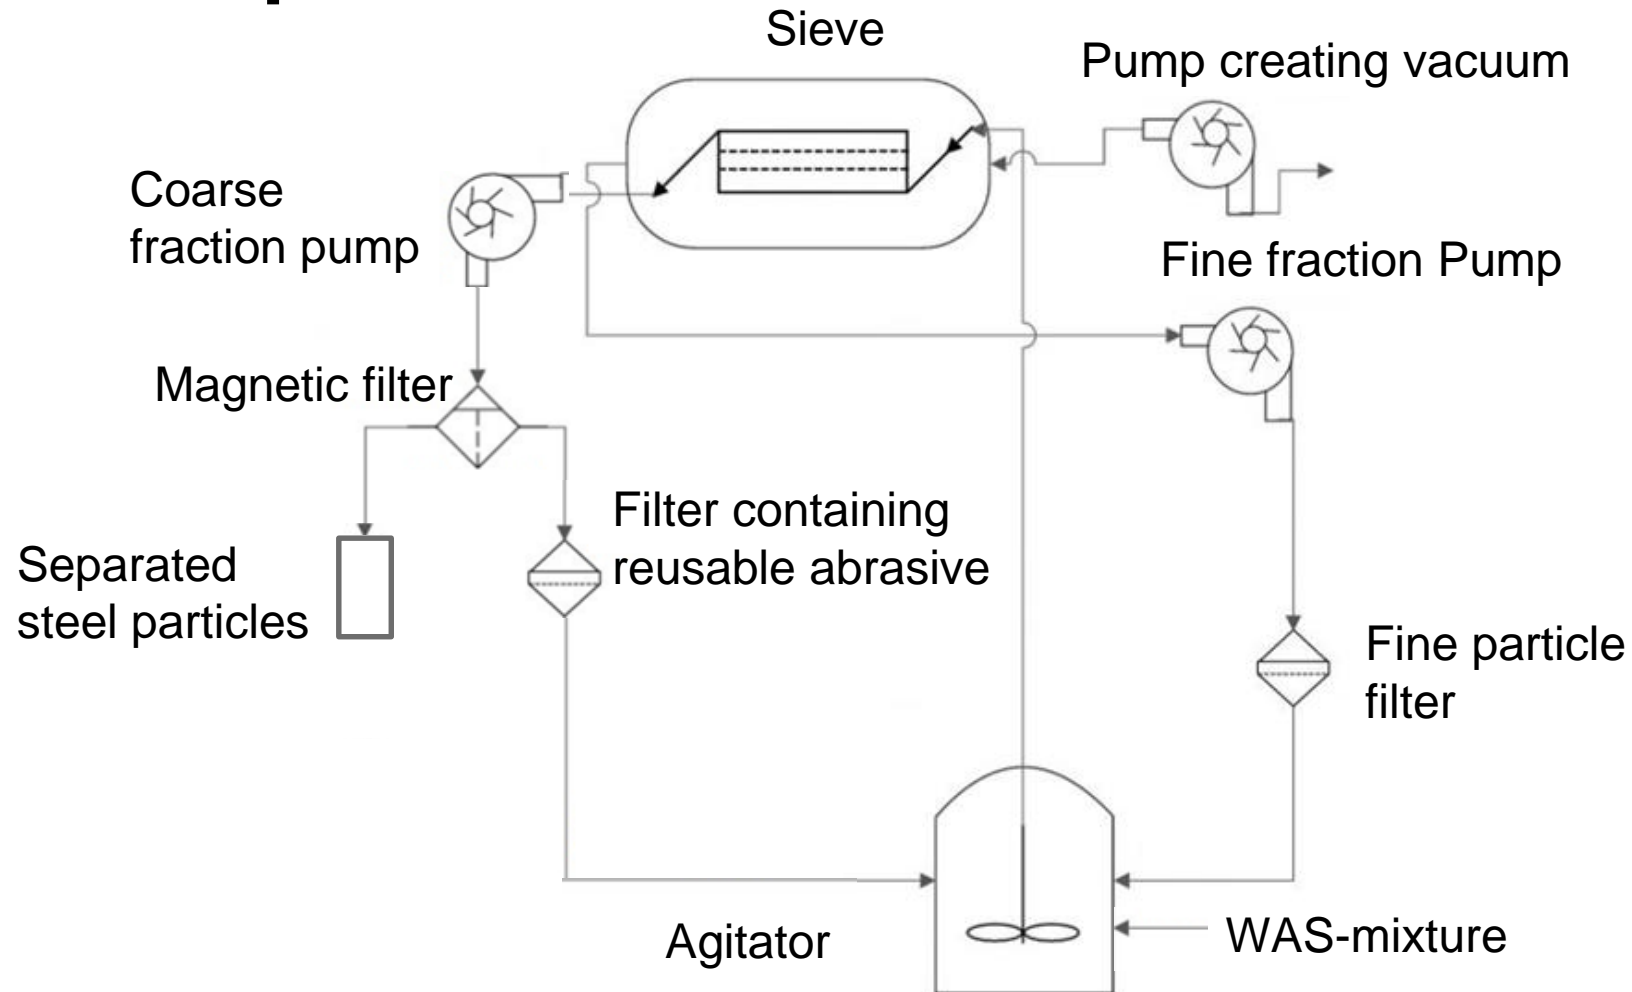

# Continuously operated sieve

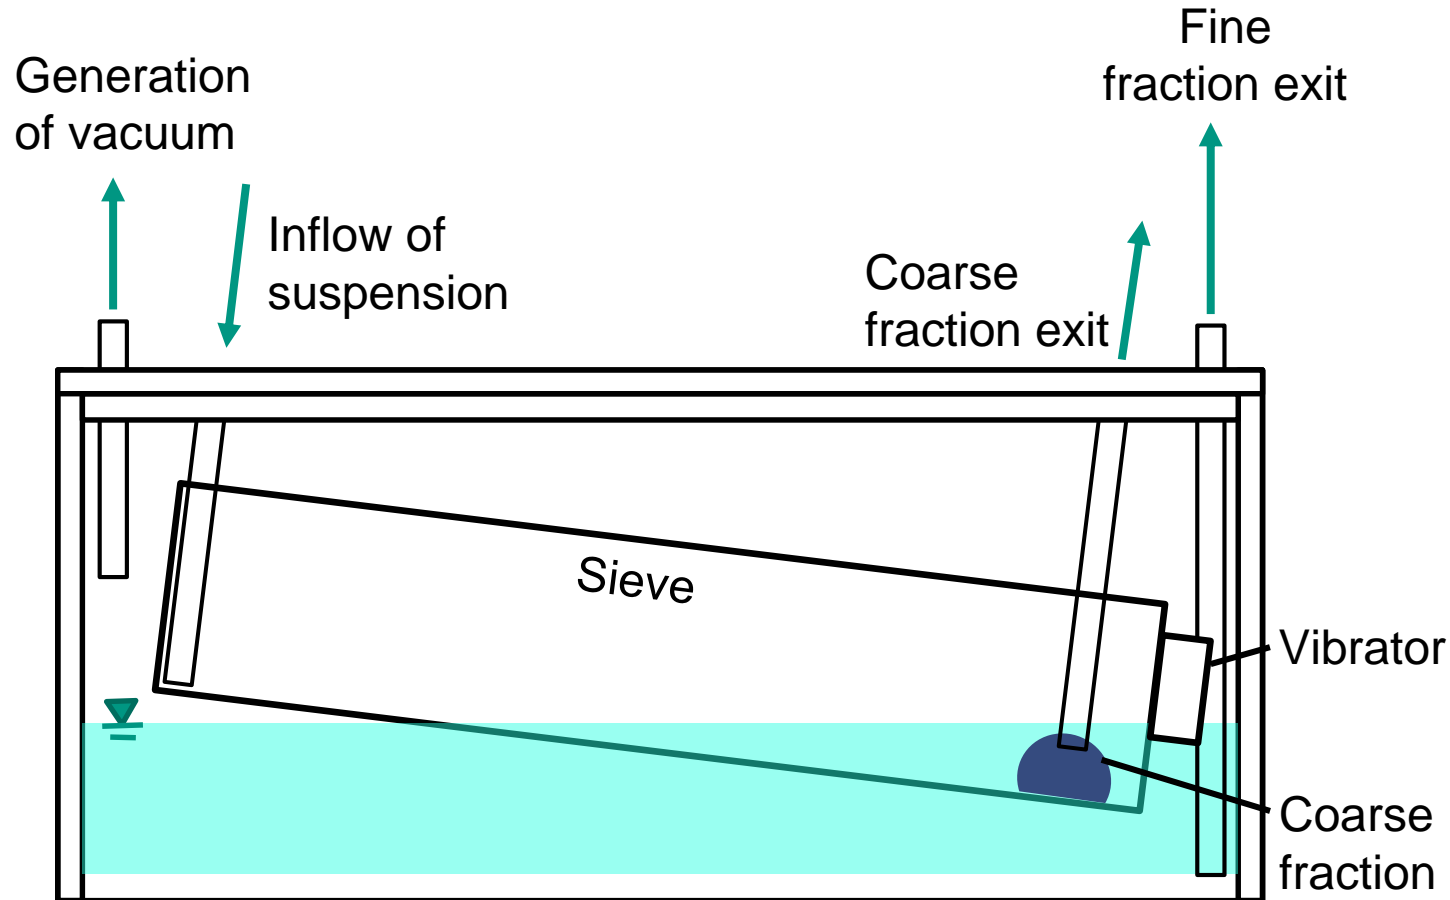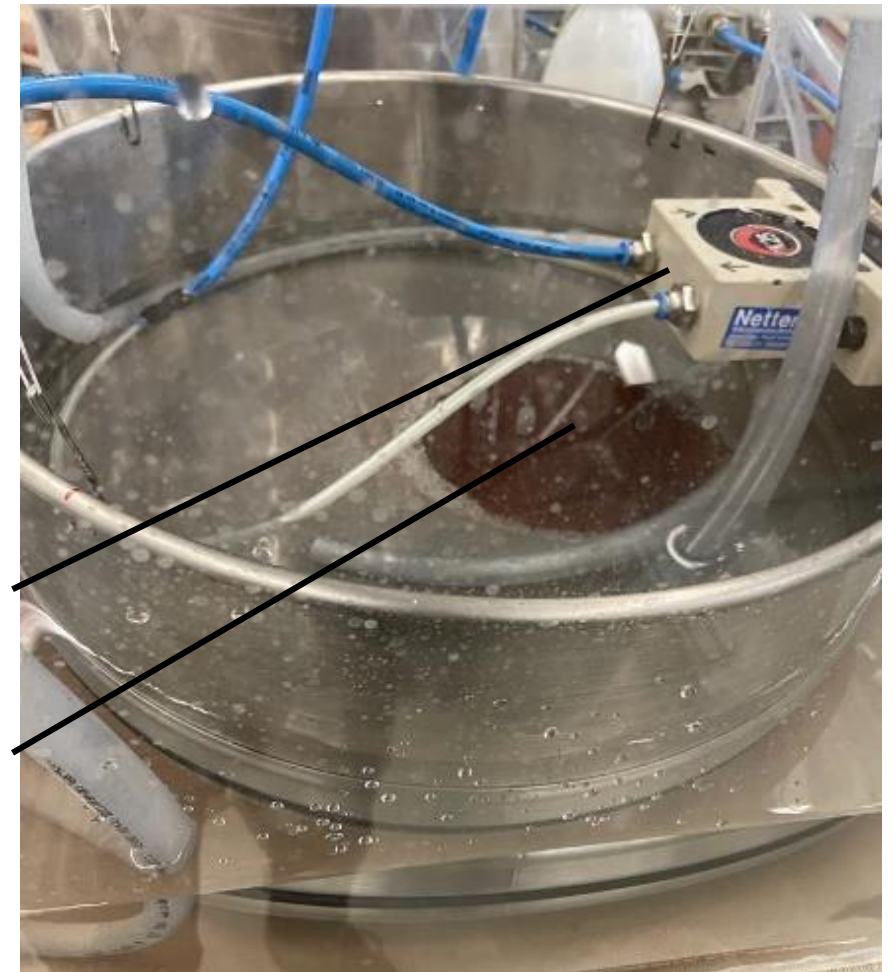

# Continuously operated magnetic filter

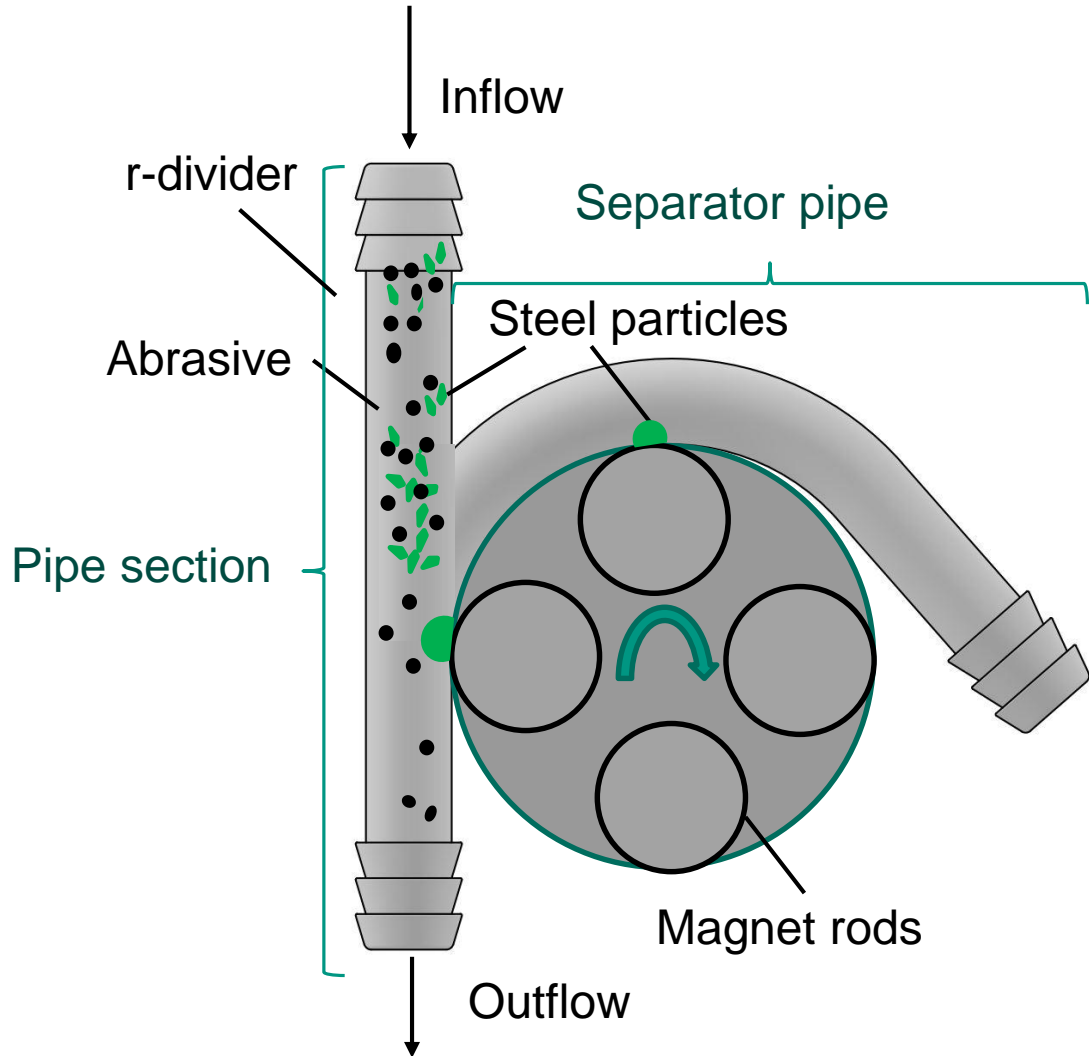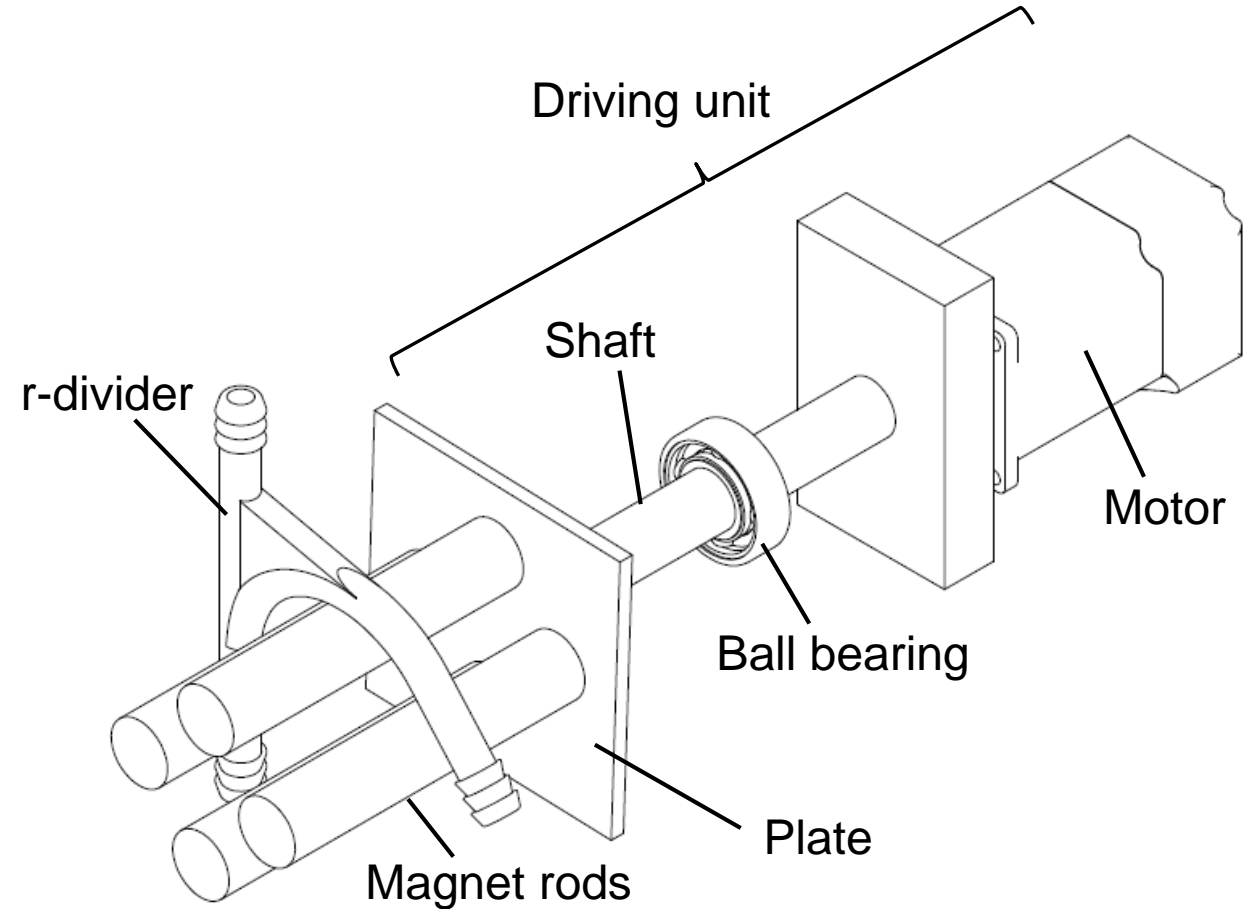

# Continuously operated magnetic filter

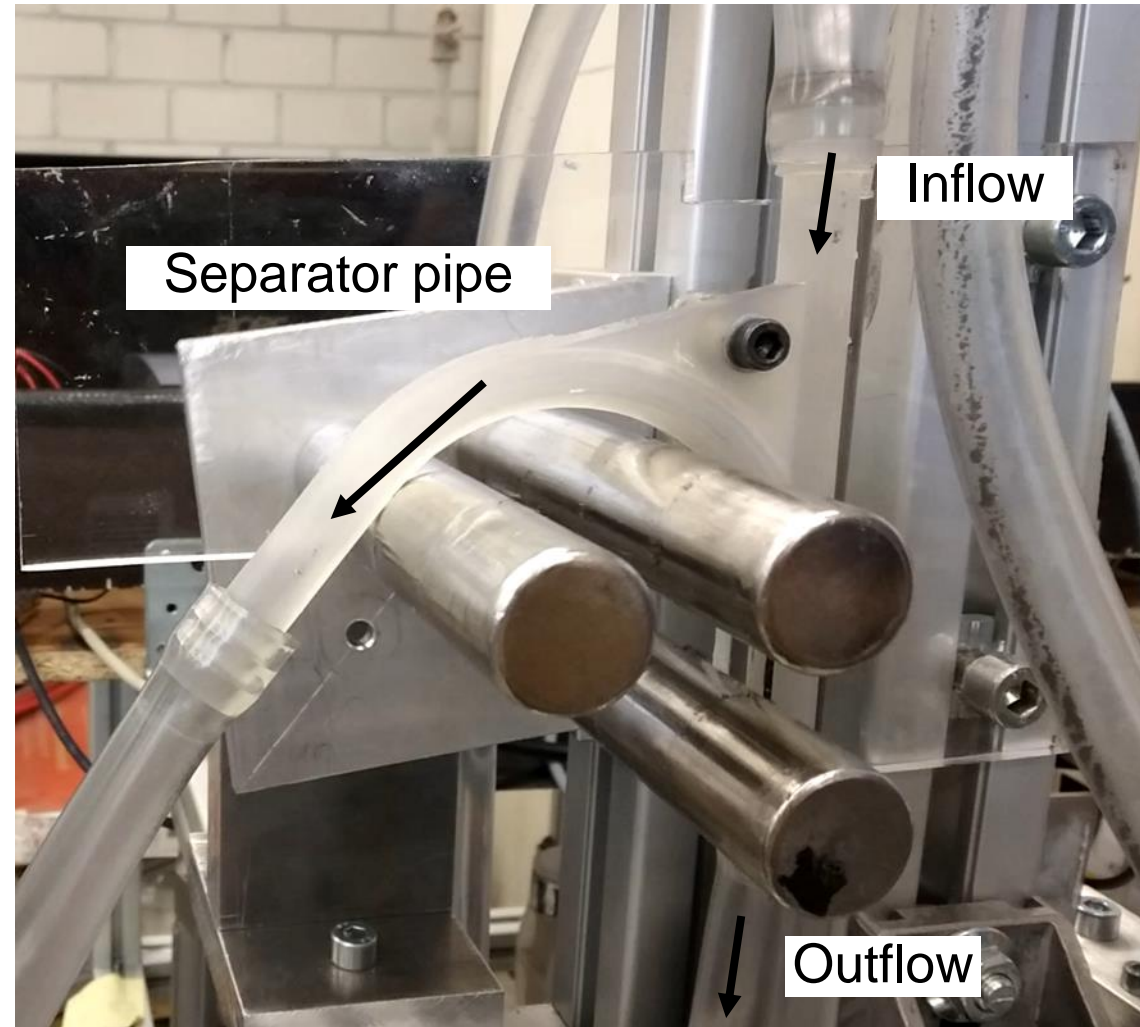

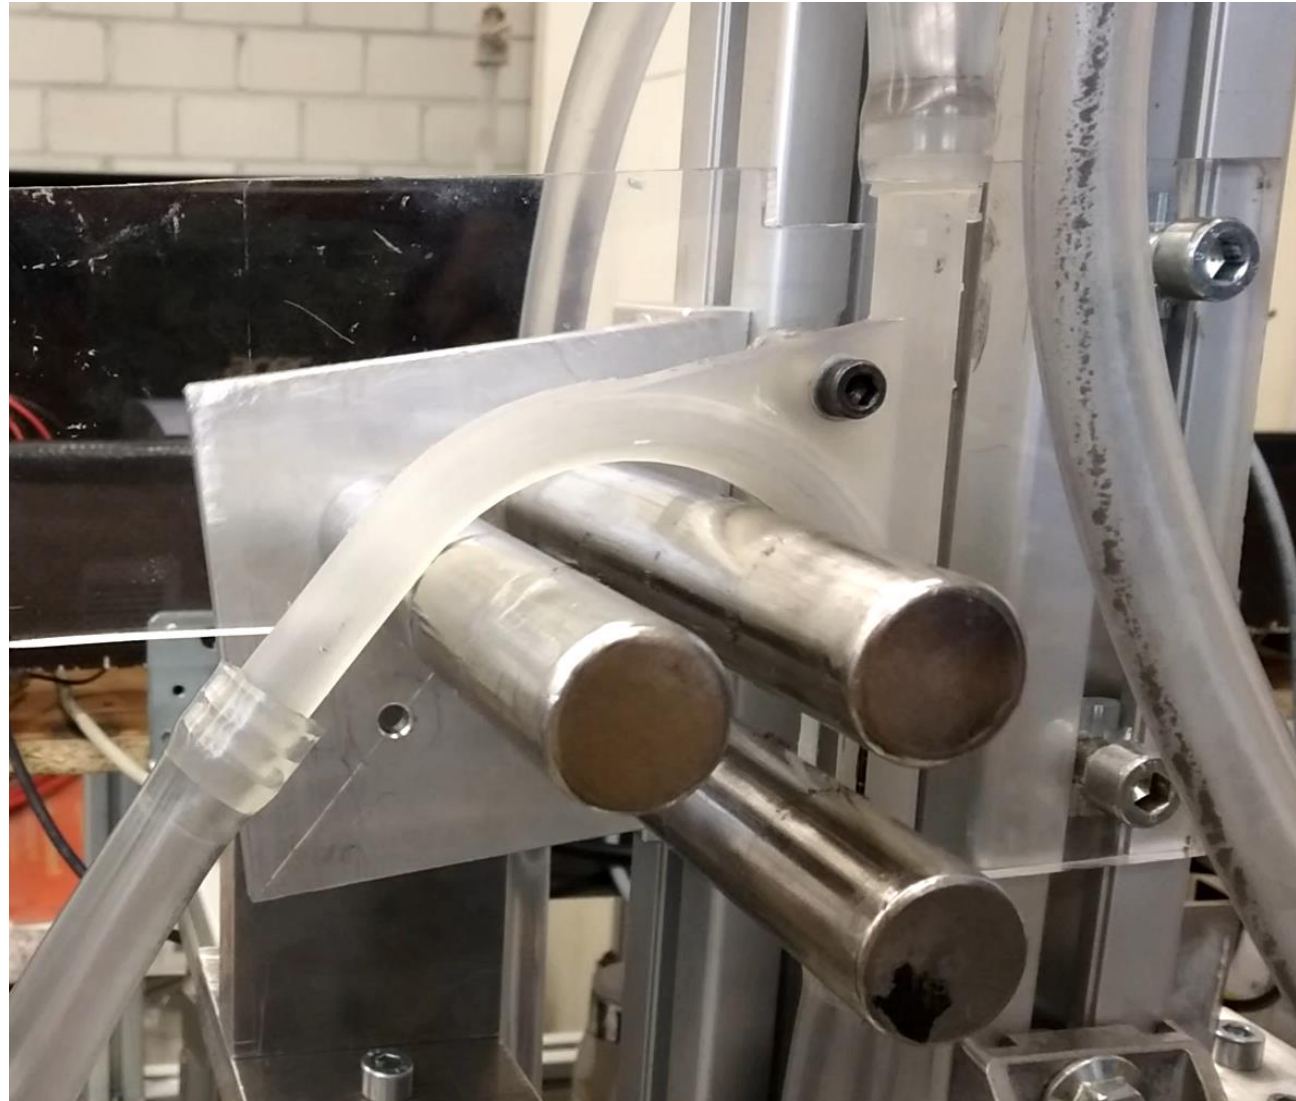

# Continuous magnetic filter: Preliminary results

Experiments:

- Only with steel particles
- Batch operation

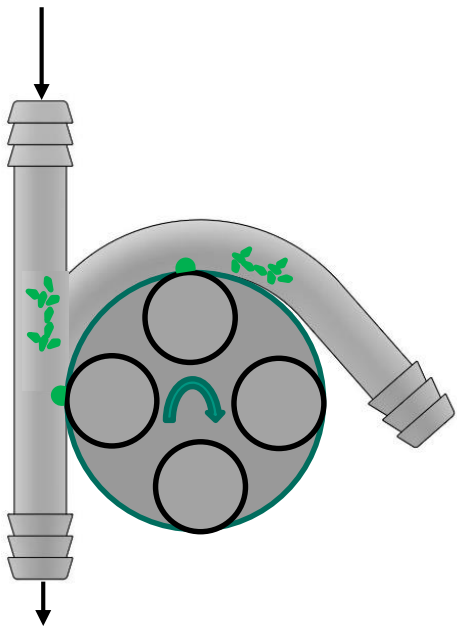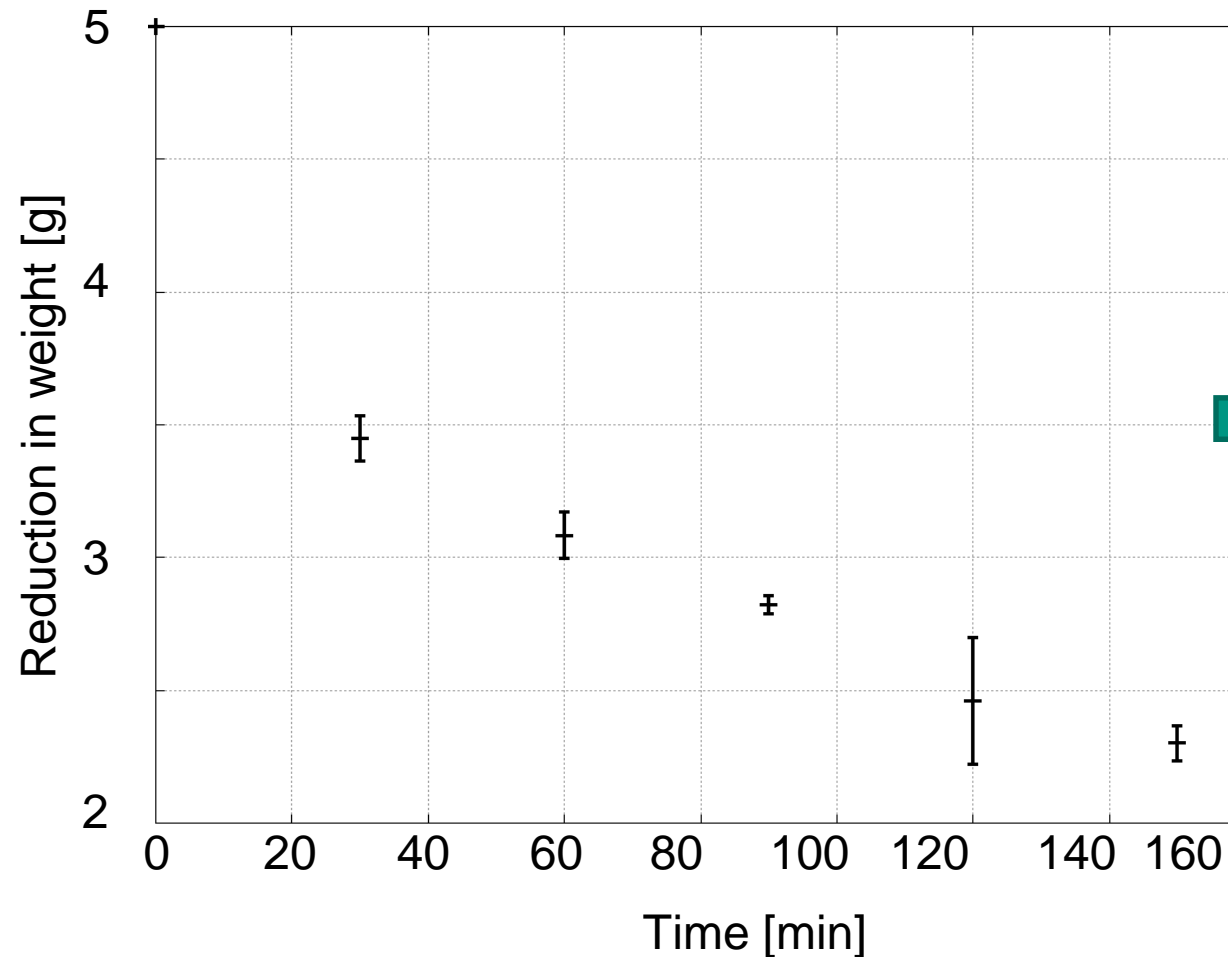

**Results:**

0.5-1% of the steel particles are separated after passing through r-divider

# Outlook

- Combined test of continuous sieve and continuous magnetic filter with abrasive-steel-mixture from WAS-cut
- Improvement of the continuous magnetic filter
  - Geometry of piping
  - Continuous flow (i.e. Peristaltic pump)
  - More r-dividers in parallel

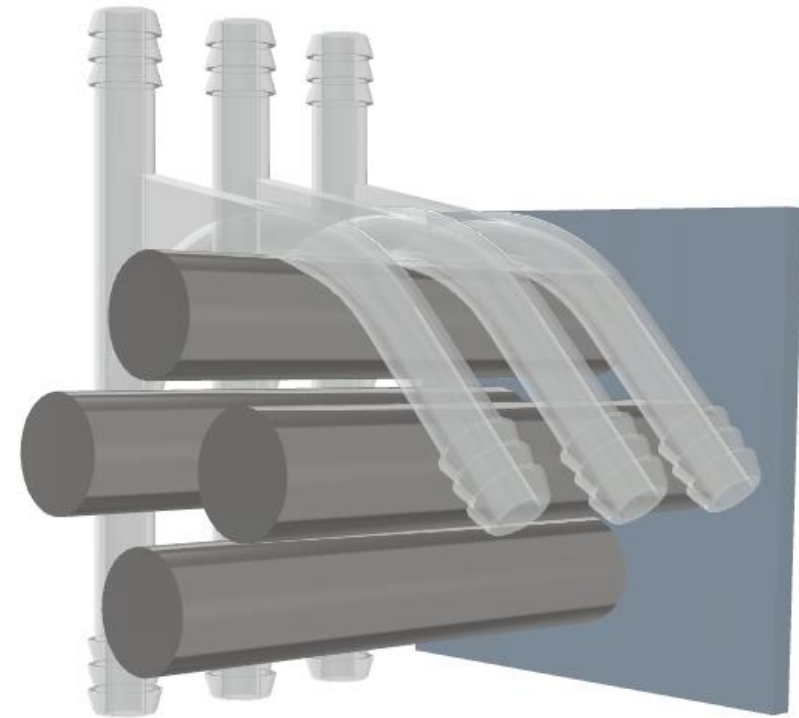

# Thank you for your attention!

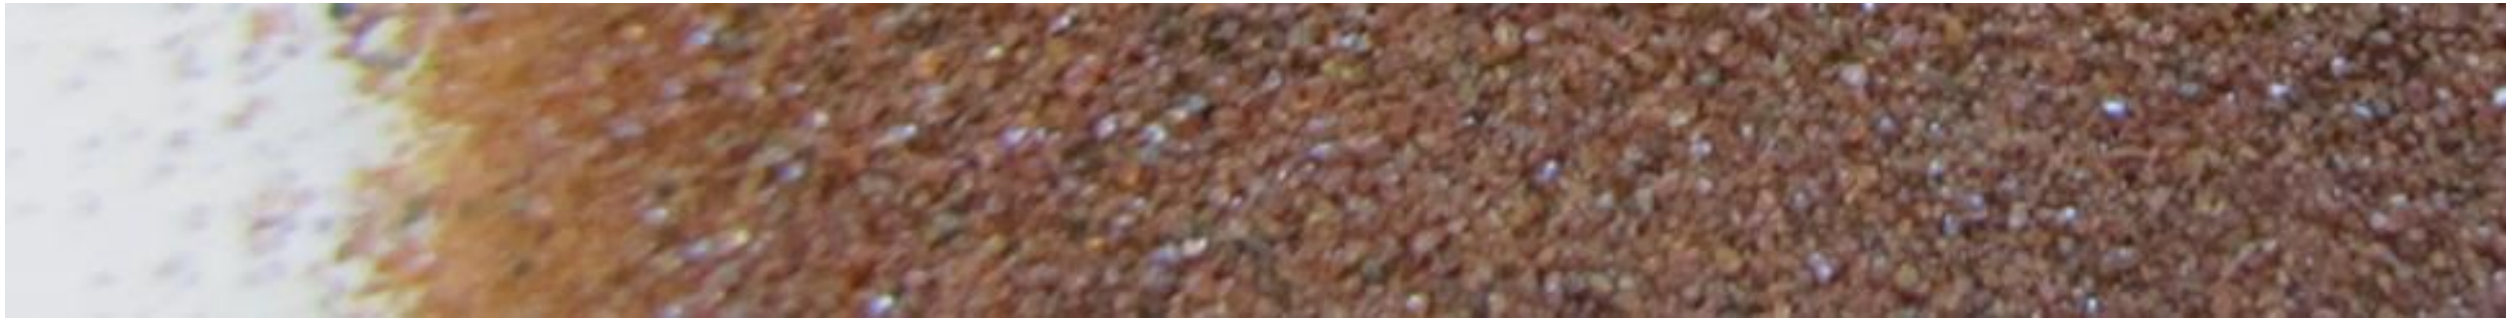

## Project NaMaSK (FKZ 15S9423)

SPONSORED BY THE

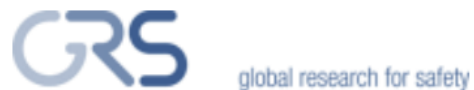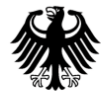

Federal Ministry  
of Education  
and Research

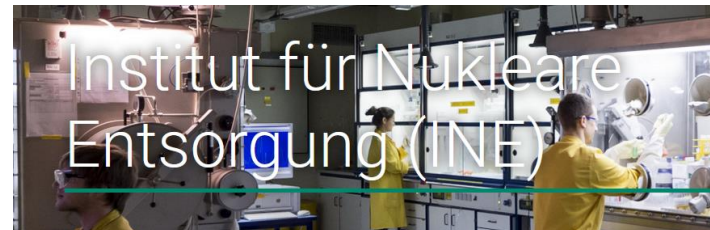

Institut für Technologie  
und Management im  
Baubetrieb

Muhammad Junaid Chaudhry  
+49 721 608 48236  
Muhammad.chaudhry@kit.edu
